# Supplementary figures and images for: Factors Predicting Pathological Upstaging of Gastric Low-Grade Dysplasia Post Endoscopic Resection: A Systematic Review and Meta-Analysis
Source: Research Square preprint supplement (doi:10.21203/rs.3.rs-2972137/v1), 2023-05-30

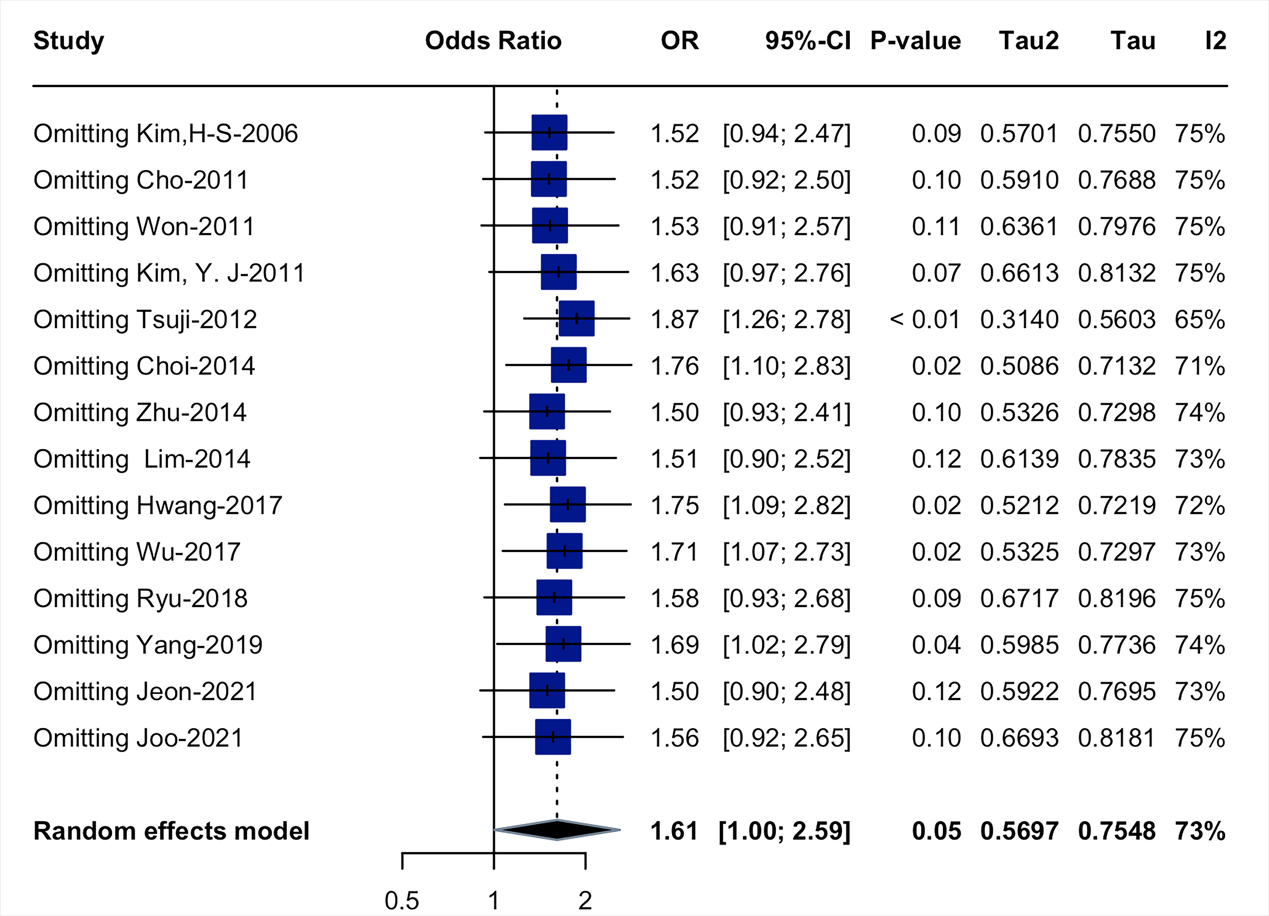


Fig.S3: Sensitivity analysis of depressed lesion and LGIN upgrade diagnosis risk

Supplement: Supplementary file 1 [file 827ca83c7c7997f9413cbc68.docx]

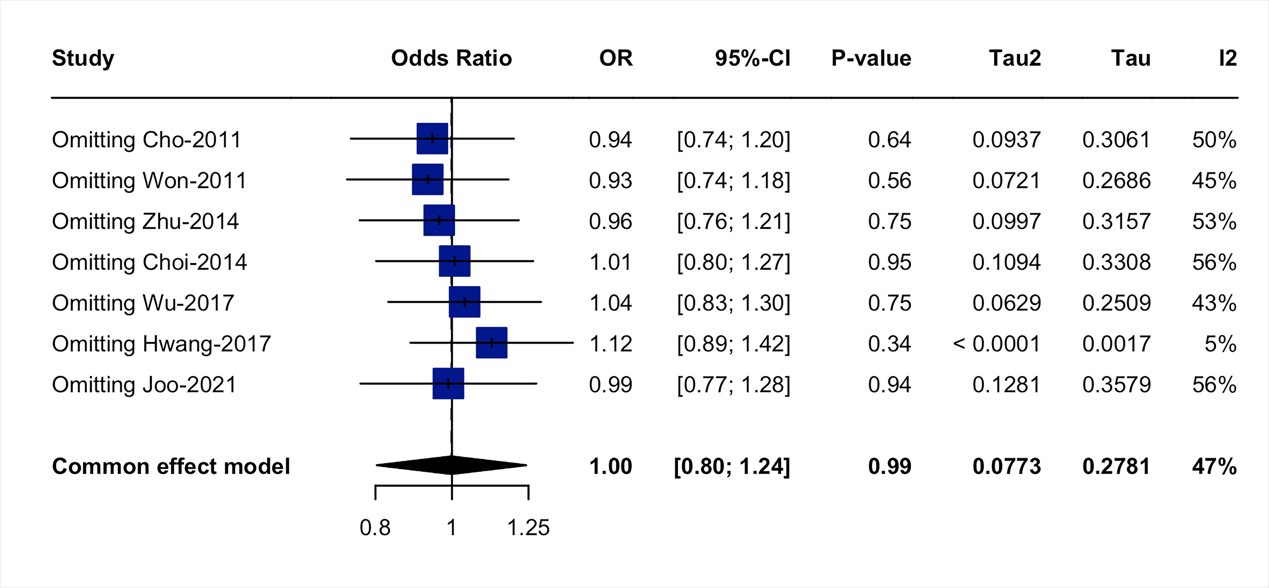


**Fig.S6: Sensitivity analysis of *Hp* infection and LGIN upgrade diagnosis risk**

Supplement: Supplementary file 2 [file 9fa09f388d2cd3c405ec49aa.docx]

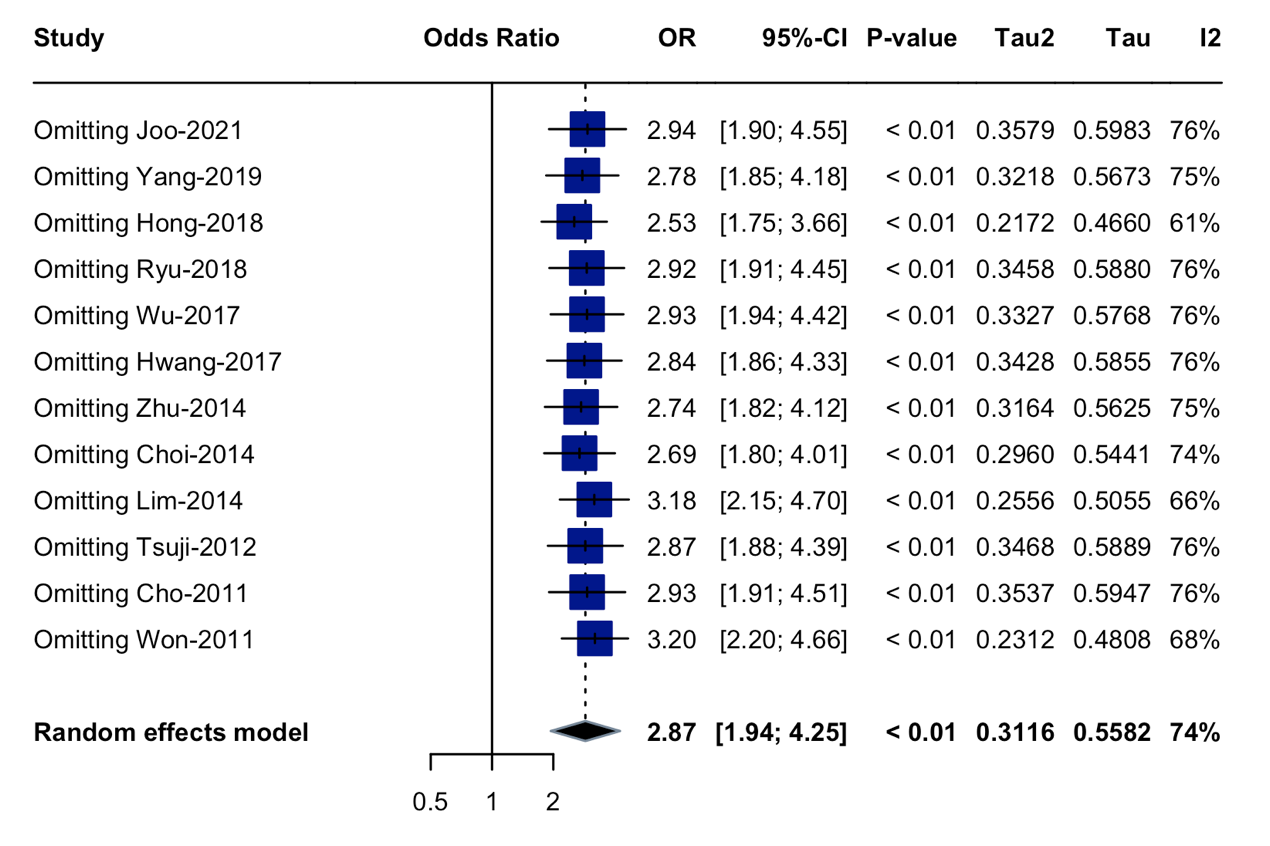


Fig.S1: Sensitivity analysis of surface erythema and LGIN upgrade diagnosis risk

Supplement: Supplementary file 3 [file ac2b6d6f19c7f5c78333f5e9.docx]

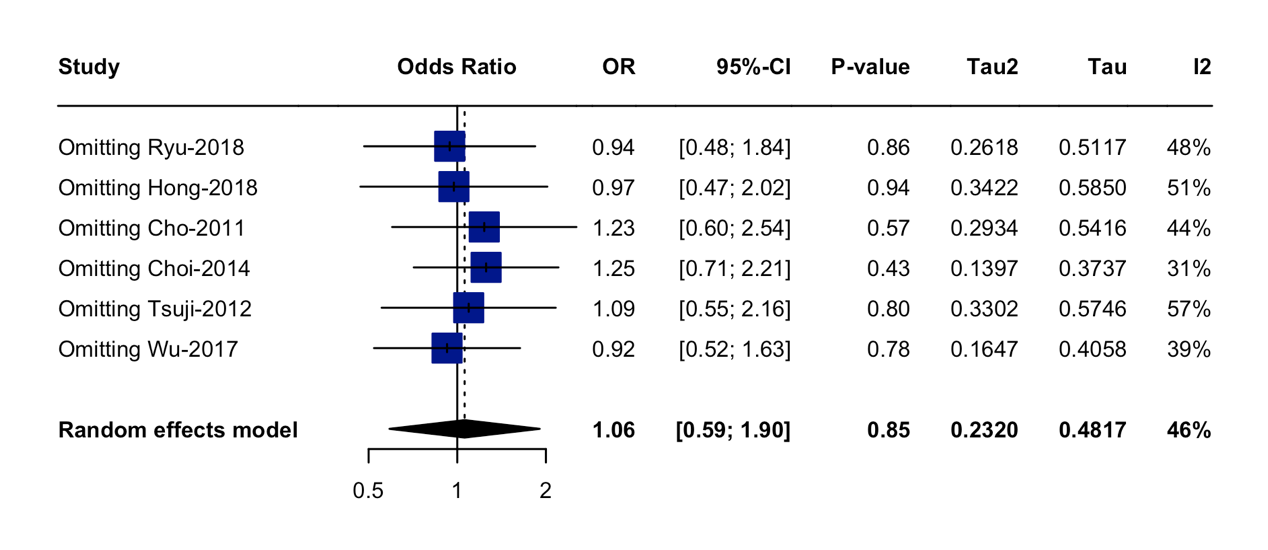


Fig.S5: Sensitivity analysis of ulceration and LGIN upgrade diagnosis risk

Supplement: Supplementary file 4 [file dad954fdb6fb1bb2c9af06ef.docx]

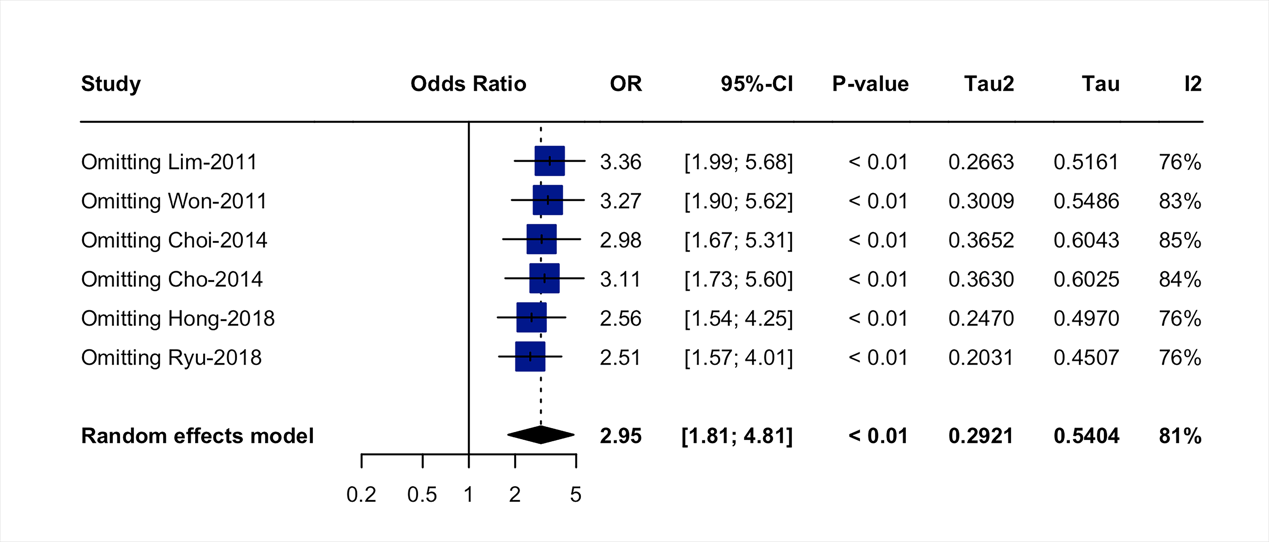


Fig.S4: Sensitivity analysis of nodularity and LGIN upgrade diagnosis risk

Supplement: Supplementary file 5 [file ef4b7d060bd4b391a9ac3322.docx]
